# Supplementary material for: Gene expression deregulation by KRAS G12D and G12V in a BRAF V600E context
Source: PubMed Central journal article supplement (PMC2615043; doi:10.1186/1476-4598-7-92), 2008-12-16

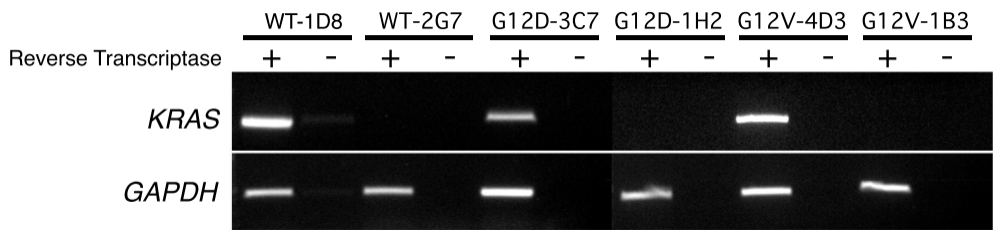

Supplement: 1476-4598-7-92-S5.pdf [file 1476-4598-7-92-S5.pdf]
