# Supplementary material for: Gene expression deregulation by KRAS G12D and G12V in a BRAF V600E context
Source: PubMed Central journal article supplement (PMC2615043; doi:10.1186/1476-4598-7-92), 2008-12-16
Supplement: 1476-4598-7-92-S6.pdf [file 1476-4598-7-92-S6.pdf]

1 2 3 4 5

A

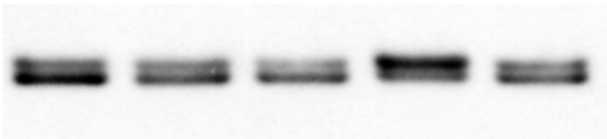

panRas

B

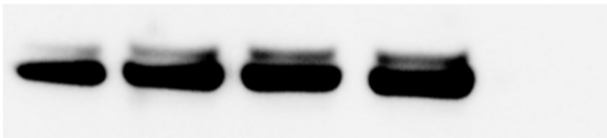

pErk1/2

C

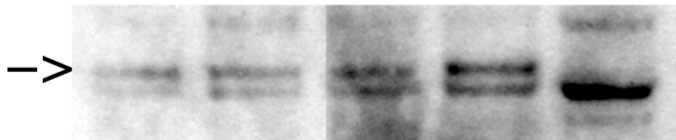

pAkt
